# Supplementary material for: Beverage-Agarose Gel Electrophoresis: An Inquiry-based Laboratory Exercise with Virtual Adaptation
Source: Atypon-hosted journal article supplement (doi:10.1187/cbe.06-01-0139), 2006-09-01
Supplement: appendix1.pdf [file appendix1.pdf]

## Appendix 1: Questions in Pre- and Postexercise Quizzes on Gel Electrophoresis

### 1. What is electrophoresis?

- A. A technique in which molecules like DNA are introduced into bacteria by applying an electric field that creates transient holes in the cell membrane
- B. A technique in which noncharged molecules are placed into gel matrix in an electric field
- C. A technique in which charged molecules are placed into a gel matrix in an electric field
- D. A technique in which a certain form of friction produces a lot of static electricity

### 2. What are the main components needed for electrophoresis?

- A. A power source
- B. A gel matrix
- C. A medium (or "buffer")
- D. A rig (a container for the gel and medium)
- E. All of the above

### 3. For what purpose is DNA electrophoresis used?

- A. To amplify a DNA for cloning
- B. To separate noncharged molecules of DNA based on size
- C. To separate charged molecules of DNA based on size
- D. To separate charged molecules of DNA based on amount of positive charge
- E. To produce static electricity by friction

### 4. Which of the following is true regarding electrophoresis and the size of DNA:

- A. Because larger DNA molecules have more negative charge, they move farther through the gel than smaller molecules
- B. Because smaller DNA molecules have more positive charge, they move less far through the gel than smaller molecules
- C. Because larger DNA molecules have less negative charge, they move farther through the gel than smaller molecules
- D. Because larger DNA molecules are larger, they move less far through the gel than smaller molecules
- E. Because larger DNA molecules have more charge, more electricity is produced

### 5. What role do ions play in DNA electrophoresis?

- A. They carry the current to complete the electrical circuit
- B. They keep the gel cool by absorbing excess current
- C. They attach to the gel and make it slippery so that the DNA can pass through the gel
- D. They participate in noncovalent bonds between the DNA and the gel

**6. Which of the following does NOT causes DNA degradation?**

- A. DNase activity
- B. EDTA
- C. Low pH
- D. Hydrolysis
- E. Depurination
- F. Oxidation
- G. Heat

**7. During electrophoresis, which one of the following is true**

- A. Electrolysis occurs and an equal amount of hydrogen and oxygen is produced
- B. Electrolysis occurs and an twice as much hydrogen as oxygen is produced
- C. Electrolysis occurs and an twice as much oxygen as hydrogen is produced
- D. Electrolysis occurs and an four times as much hydrogen as oxygen is produced
- E. Electrolysis occurs and an four times as much oxygen as hydrogen is produced
